# Supplementary material
Source: publisher site journal article supplement (https://www.dovepress.com/get_supplementary_file.php?f=268126.xlsx)
Supplement: Supplementary file 1 [file get_supplementary_file.php]

## Sheet: 1120原本
Supplemental material: Table S1: Data to support the findings of the study
background									IOLMaster				BCVA	Refractive prediction error		CASIA												OPD (HOA)								Subjective refraction value
									Preoperative		Postoperative					Preoperative			3 months after surgery									Preoperative			3 months after surgery					Preoperative				3 months after surgery				Target refraction
group	male or Female	age	eye	Emery-Little classification grade	type		IOL	IOL(D)	Axial length	K values	Axial length	K values	logMAR	Arithmetic mean	Absolute value average	Corneal -AVE K values	Corneal astigmatism	Axis	Corneal -AVE K values	astigmatism	Axis	ATA depth	ACD	IOL tilt	Axis	IOL decentration	Axis	total HOA	corneal HOA	intraocular HOA	total HOA	corneal HOA	intraocular HOA	intraocular coma aberration	intraocular trefoil	BCVA	Spherical	Cylinder	Axis	BCVA	Spherical	Cylinder	Axis	SRK/T
IN	M	86	R	4	Nuclear		NX-70	22.5	24	42.77			0	-0.115506	0.115506	43.2	0.8	105	43	0.76	129	4.134	4.878	5.6	199	0.25	283				0.244	0.343	0.211	0.095	0.107	0.05	-2	0		1	-0.25	-1.5	115	-0.884452
IN	F	59	R	3	Nuclear		NX-70	26.5	21.9	45.09	21.87	44.89	0.154902	-0.0724455	0.0724455	44.62	0.51	44	44.73	1.12	27	3.686	4.301	7	224	0.21	239	0.331	0.419	0.321	0.544	0.397	0.223	0.112	0.179	0.7	3.25	-1	65	0.7	0.75	-2.5	25	-0.427502
IN	M	67	R	3	Nuclear		X-70	23	23.41	44.09	23.39	44.615	0.09691	-0.0875213	0.0875213	44.1	0.4	97	44.23	0.84	152	4.106	4.863	6.4	193	0.26	81	0.862	0.138	0.934	0.242	0.148	0.164	0.086	0.088	0.3	1.25	-0.75	130	0.8	-0.5	-1	170	-0.912436
IN	F	79	R	2	Nuclear		NX-70	22	23.14	45.03	23.1	45.28	-0.0791812	0.192749	0.192749	45	0.7	92	44.86	0.32	84	4.114	4.728	4.2	211	0.2	280	0.329	0.318	0.294	0.433	0.188	0.367	0.031	0.356	0.9	2.25	-1	85	1.2	0.25	-0.75	80	-0.317708
IN	M	76	R	3	Nuclear		NX-70	21.5	24.19	42.11	24.17	42.345	-0.176091	-0.130348	0.130348	42.43	0.32	118	42.45	0.76	130	3.951	4.619	7.4	182	0.31	151	error	0.134	error	0.244	0.118	0.182	0.092	0.14	0.6	0.75	-1	135	1.5	0.25	-1	105	-0.119613
IN	M	59	R	2	Nuclear		X-70	12.5	26.66	43.37	26.58	43.45	-0.0791812	0.279152	0.279152	43.39	0.19	74	43.36	0.9	17	3.984	4.825	2.7	214	0.27	342				0.091	0.105	0.098	0.083	0.012	1	-5	-0.75	90	1.2	0	0	0	-0.279131
IN	F	64	L	3	PSC		NX-70	20.5	24.5	43.21	24.46	43.265	-0.176091	-0.0541557	0.0541557	43.56	0.78	138	43.76	0.87	162	3.837	4.477	4.8	337	0.1	153	0.288	0.339	0.252	0.36	0.327	0.158	0.126	0.071	0.8	-1	-1	110	1.5	-1	0		-0.945808
IN	M	79	L	3	PSC		NX-70	20.5	24.52	42.14	24.57	42.29	0.09691	-0.045934	0.045934	42.29	0.32	41	42.44	0.22	15	3.95	4.619	5.3	344	0.07	42	0.656	0.217	0.53	0.332	0.233	0.134	0.037	0.102	0.5	-0.5	-1.5	105	0.8	0.25	-1	80	-0.20403
IN	F	75	L	3	Nuclear		NX-70	27	22.13	43.77	22.13	43.775	-0.176091	0.425076	0.425076	43.85	0.29	10	43.77	0.43	14	3.592	4.169	6.6	341	0.22	339	0.15	0.161	0.197	0.237	0.176	0.195	0.083	0.089	1.2	3.75	-0.75	85	1.5	0	0		-0.425023
IN	M	64	L	3	Cortical		NX-70	21	23.59	45.59	23.39	45.77	0	-0.237039	0.237039	45.78	1.35	86	45.83	0.43	84	3.878	4.437	1.7	346	0.58	104	0.405	0.173	0.477	0.247	0.2	0.116	0.053	0.078	0.06	-2	0		1	-0.75	-1	90	-1.01292
IN	M	88	R	4	Nuclear		NX-70	20.5	23.79	44.29	23.71	44.435	0.154902	0.579302	0.579302	44.66	0.73	92	44.37	0.75	91	3.971	4.918	4.5	210	0.28	272	0.419	0.249	0.219	0.354	0.16	0.246	0.025	0.218	0.8	0.75	-1.75	90	0.7	1.25	-1.75	100	-0.204265
IN	M	76	R	3	Nuclear and PSC		NX-70	23.5	22.78	44.84	22.68	44.78	0.0457575	0.110324	0.110324	44.71	0.67	74	44.83	0.39	67	3.946	4.724	4.8	230	0.26	260	error	0.272	error	0.395	0.218	0.227	0.078	0.2	0.3	2.5	0		0.9	0	-0.5	75	-0.360279
IN	F	71	R	2	Nuclear		X-70	22	23.09	45.09	23.08	44.96	-0.0791812	0.00192062	0.00192062	45.15	0.44	43	45.19	0.46	15	3.53	4.462	4.6	210	0.13	111	0.289	0.144	0.2	0.141	0.123	0.063	0.016	0.016	0.6	0.75	-0.75	80	1.2	0	-0.5	50	-0.25188
IN	F	70	L	2	Nuclear and Cortical		NX-70	23.5	23.31	42.88	23.32	43.095	-0.176091	-0.589472	0.589472	43.09	0.41	106	43.13	0.31	134	3.777	4.473	5.5	330	0.1	335	0.303	0.227	0.237	0.114	0.112	0.115	0.085	0.041	0.7	3	-1.25	90	1.5	-0.5	-0.5	90	-0.160484
IN	F	74	L	2	Cortical		NX-70	18.5	25.14	44.02	25.15	44.235	-0.176091	-0.148271	0.148271	43.88	0.49	79	44.13	0.32	8	4.1	4.957	4.1	328	0.39	160	0.447	0.305	0.282	0.485	0.334	0.216	0.099	0.181	0.5	-2.75	-1	105	1.5	-1.75	0		-1.6017
IN	M	45	L	4	Cortical and PSC		NX70	20.5	23.74	44.33	23.72	44.355	-0.176091	0.135717	0.135717	44.38	0.41	177	44.84	0.88	176	4.108	4.738	3.9	349	0.17	311	0.198	0.169	0.301	0.308	0.188	0.173	0.134	0.095	0.4	0	0	0	1.5	0	0		-0.135717
IN	F	53	L	1	Cortical		NX-70	21.5	24.81	40.73	24.82	40.665	-0.0791812	-0.158227	0.158227	40.78	1.32	21	40.8	1.35	19	3.791	4.531	4.9	329	0.12	238	0.492	0.15	0.49	0.118	0.124	0.143	0.09	0.079	0.9	1	-0.5	50	1.2	0	-1.25	35	-0.466773
IN	F	69	L	3	PSC		NX-70	17.5	25.45	42.22	25.44	42.345	-0.0791812	0.253455	0.253455	42.14	0.52	145	42.31	0.88	154	3.802	4.568	6.4	318	0.2	30	error	0.156	error	0.252	0.185	0.192	0.063	0.126	0.2	0	0	0	1.2	-0.5	0		-0.246545
IN	M	70	R	2	Nuclear		NX-70	21.5	23.8	43.51	23.76	42.935	-0.176091	-0.331025	0.331025	43.29	0.65	45	43.19	0.57	93	3.805	4.44	7.6	198	0.35	179	0.129	0.073	0.14	0.177	0.154	0.118	0.078	0.058	0.8	0.25	-0.5	80	1.5	0.5	-1	100	-0.331025
IN	F	62	L	3	Nuclear		NX-70	19	24.83	43.07	24.83	43.305	-0.176091	-0.186707	0.186707	43.09	1.03	94	43.35	0.56	78	4.075	5.075	5.6	332	0.07	200	0.263	0.16	0.292	0.186	0.175	0.175	0.148	0.038	1.2		-1.75	90	1.5	0	-1.5	75	-0.563293
IN	F	78	L	2	Cortical and PSC		NX-70	23	22.7	45.25	22.64	45.245	-0.0791812	0.512551	0.512551	45.25	0.33	58	45.31	0.57	16	3.901	4.754	5.8	334	0.03	93	0.513	0.234	0.474	0.286	0.228	0.152	0.079	0.077	0.3	2.75	-1.25	175	1.2	0.75	-0.75	75	-0.137551
					Diagnosis
SF	M	71	L		aphakia		X-70	24.5	22.18	45.62	22.3	45.85	0.30103	0.150269	0.150269	45.5	0.9	90	45.83	2.03	79	3.706	4.843	10.1	42	0.41	350				0.399	0.281	0.264	0.196	0.116	0.6	13.5	-0.75	85	0.5	1.25	-2.5	90	-0.150269
SF	M	85	R		aphakia		NX-70	22.5	23.2	44.17			-0.0791812	0.67312	0.67312	44.4	0.48	101	44.37	0.23	73	4.126	5.407	6.7	36	0.04	134	0.204	0.133	0.153	0.166	0.167	0.101	0.078	0.02	0.9	12.25	-1	95	1.2	1	-1	105	-0.17312
SF	F	74	L		aphakia		NX-70	17	24.26	46.015	23.98	45.245	0.09691	0.155865	0.155865	45.97	1.35	35	45.36	1.25	63	3.74	4.825	9.5	243	0.63	58	0.589	0.676	0.641	0.855	0.378	0.612	0.162	0.476	0.9	10	-0.75	30	0.8	0.5	-1	55	-0.155865
SF	M	68	R		aphakia		NX-70	23	23.82	41.915	23.86	41.91	-0.176091	1.22367	1.22367	41.81	1.18	13	42.14	0.96	21	4.464	6.211	11.5	38	1.08	218	0.564	0.128	0.576	0.314	0.176	0.281	0.049	0.197	1.5	13.5	-0.5	15	1.5	1.25	-0.5	30	-0.223674
SF	M	64	L		Dislocated IOL		X-70	24	23.15	43.12	23.22	42.64	0.154902	1.44574	1.44574	42.84	0.35	30	42.55	2.78	105	3.715	5.319	2.2	113	0.47	295	0.134	0.135	0.147	0.769	0.554	0.26	0.06	0.229	0.4	13.5	0	0	0.7	2	-1.75	115	-0.320743
SF	M	79	R		Subluxated crystalline lens		NX-70	23	22.77	45.595	22.73	45.68	0.154902	-0.842448	0.842448	45.98	0.96	4	45.92	1.34	172	3.805	4.509	14.3	247	0.37	292	0.669	0.312	0.435	0.199	0.388	0.395	0.104	0.301	0.3	-0.75	-1	105	0.7	-1	-0.75	120	-0.532552
SF	M	86	L		aphakia		NX-70	22.5	23.36	43.65	23.4	43.72	0.154902	0.395095	0.395095	43.99	1.69	96	44.06	1.82	98	4.857	5.763	6.8	53	0.86	285	0.302	0.252	0.304	0.349	0.266	0.242	0.146	0.091	0.4	13.5	-1.5	90	0.7	1.5	-2.5	95	-0.145095
SF	F	78	L		aphakia	prolapse of iris	NX-70	26.5	22.42	43.365	22.49	43.095	0.221849	-0.0333955	0.0333955	43.17	2.58	115	43.94	0.85	122	4.103	5.16	11.3	73	0.1	76	0.583	0.448	0.231	1.022	0.741	0.361	0.042	0.326	0.5	15.5	-2.25	105	0.6	-0.25	-0.5	160	-0.466605
SF	M	88	L		aphakia		NX-70	21.5	23.62	43.795			0	-0.971417	0.971417	44.05	0.84	64	43.99	0.75	66	3.935	4.413	11.9	28	0.19	254	0.714	0.521	0.983	0.602	0.386	0.33	0.183	0.258	0.4	12	-1.5	90	1	-0.5	-1.25	105	-0.153583
SF	M	60	R		Dislocated IOL		X-70	23	22.97	44.39	23.04	44.285	-0.0791812	-0.977203	0.977203	44.49	1.02	145	44.22	1.16	107	3.593	3.866	6.8	200	0.24	304	error	0.208	error	0.56	0.42	0.22	0.116	0.163	0.6	12	0		1.2	-0.5	-1.25	110	-0.147797
SF	M	82	R		aphakia		X-70	21	24.25	42.445			0	-0.103678	0.103678	42.46	1.69	64	42.71	1.57	58	4.421	4.81	5	73	0.73	199	0.349	0.182	0.275	0.348	0.271	0.16	0.093	0.089	1.2	12.25	-1.25	75	1	0.5	-1.5	70	-0.146322
SF	M	75	L		aphakia	Nuclear fall	NX-70	23.5	23.21	42.67	23.16	43.265	-0.176091	-1.48381	1.48381	42.9	1.1	99	42.95	2.79	70	3.406	3.951	3.6	346	1.11	334				0.317	0.493	0.474	0.306	0.186	0.4	13.5	-2	90	1.5	0.5	-3.5	80	0.233808
SF	M	76	L		Dislocated IOL		NX-70	20	23.78	45.43	23.86	45.77	0.09691	-2.11086	2.11086	45.1	0.53	174	45.5	1.3	170	4.194	5.051	13.7	51	0.43	92	error	0.749	error	0.95	0.528	0.566	0.138	0.513	0.15	0	0		0.8	-1.25	-3	165	-0.639141
SF	M	52	L		Dislocated IOL	Increased intraocular pressure	NX-70	15.5	25.05	46.185			0.221849	-1.75846	1.75846	46.05	3.66	164	46.49	4.79	157	4.078	4.467	17.8	238	1.34	313									0.6	8.25	-2	160	0.6	-1	-3.5	160	-0.991545
SF	M	86	R		Subluxated crystalline lens		NX-70	22.5	23.88	43.135	23.76	43.145	0.09691	1.52815	1.52815	43.28	0.18	126	43.35	1.29	91	4.111	5.938	4.7	93	0.38	161	1.073	0.333	0.875	0.431	0.318	0.216	0.125	0.162	0.02	0	0	0	0.8	1.25	-1.25	100	-0.903146
SF	M	88	L		Dislocated IOL	PE	X-70	24.5	23.56	42.19	23.64	42.43	0.09691	0.366412	0.366412	42.41	2.39	86	42.53	0.52	117	3.681	4.893	7.7	38	0.17	32				0.446	0.327	0.259	0.063	0.206	0.8	0	-2	85	0.8	0.25	-1.5	100	-0.866412
SF	M	74	R		Dislocated IOL		NX-70	20	24.63	43.385	24.65	43.53	0.221849	-0.74686	0.74686	43.78	2.35	0	43.64	2.74	3	4.452	5.049	7	68	0.62	185	0.461	0.286	0.417	0.43	0.222	0.349	0.048	0.313	0.3	0	-2	180	0.6	-0.75	-2	175	-1.00314
SF	M	83	L		Dislocated IOL		X-70	12.5	26.04	45.5	26.07	45.435	-0.0791812	-1.01978	1.01978	45.28	1.3	5	45.47	1.14	19	4.19	4.695	5.6	24	0.38	62				0.373	0.31	0.244	0.137	0.177	0.8		-1.5	180	1.2	-1.5	-0.5	15	-0.730223
SF	F	65	R		aphakia		NX-70	25.5	22.78	42.915	22.9	42.94	-0.176091	1.09805	1.09805	43.13	0.89	9	43.1	0.93	7	3.982	5.352	7.5	41	0.26	132	0.261	0.108	0.25	0.177	0.135	0.155	0.13	0.015	1	13.75	0		1.5	1	-0.5	180	-0.348053
SF	F	86	L		Dislocated IOL		X-70	23	23.4	43.235	23.42	43.48	0	-0.600135	0.600135	43.58	0.65	78	43.69	0.56	179	3.9	4.479	10.2	14	0.58	126	0.479	0.188	0.472	0.33	0.258	0.184	0.095	0.127	1	0.5	-1	90	1	0	-1.75	105	-0.274865
SF	M	67	L		Dislocated IOL		NX-70	21	24.54	41.82	24.6	42.395	0.09691	0.325572	0.325572	42.19	2.2	94	42.59	2.85	99	4.034	5.616	10.8	271	0.43	354	0.376	0.225	0.28	0.578	0.419	0.267	0.078	0.212	0.4	11.5	-2	95	0.8	1.25	-2.5	100	-0.325572
